# Supplementary material for: Highly promising discrimination of various catecholamines using ratiometric fluorescence probes with intermolecular self-association of two sensing elements
Source: Royal Society of Chemistry journal article supplement (doi:10.1039/c5ra10321e), 2015-01-01
Supplement: c5ra10321e1.pdf [file c5ra10321e1.pdf]

# Highly Promising Discrimination of Various Catecholamine by Ratiometric Fluorescence under Intermolecular Self-Association of Two Sensing Elements

Yanisa Sanguansap,<sup>a</sup> Vithaya Reaugpornvisuti,<sup>a</sup> Thawatchai Tuntulani,<sup>a</sup> Boosayarat Tomapatanaget,<sup>\*a</sup>

<sup>a</sup> Department of Chemistry, Faculty of Science, Chulalongkorn University, Phayathai Road, Bangkok, Thailand

tboosayarat@gmail.com

## Supplementary data

(16 pages)

### 1. Synthesis of crown ether/coumarin based sensor

#### 1.1 Preparation of 7-diethylamino-2-oxo-2H-chromen-3-carboxylic acid (**1**)

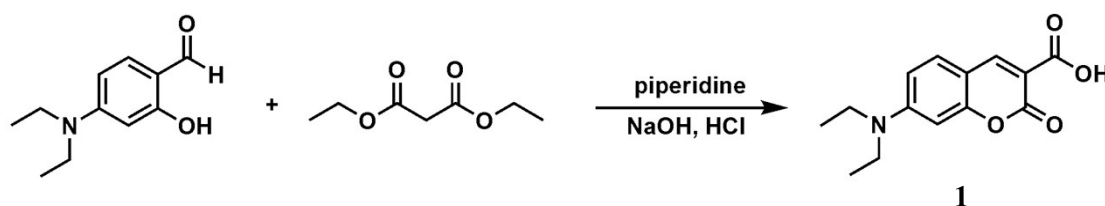

Scheme S1 Synthesis of compound **1**

Into a two-neck round bottom flask equipped with a magnetic bar, 4-diethylaminosalicylaldehyde (0.386 g, 2 mmol), diethylmalonate (0.61 mL, 4 mmol), and piperidine (0.2 mL) were dissolved in absolute ethanol (6 mL). The reaction mixture was stirred and refluxed for 6 hours under nitrogen atmosphere. Then 10% NaOH (6 mL) solution was added to the reaction and refluxed for 15 min. The solution was cooled to room temperature and acidified to pH 2 using concentrated hydrochloric acid at 0°C affording a precipitate deposit which was filtered out, washed with water, then recrystallized with ethanol to give an orange crystal (**1**, 74%). <sup>1</sup>H-NMR (400 MHz, CDCl<sub>3</sub>): δ (in ppm) = 12.37 (s, 1H, COOH), 8.67 (s, 1H, ArH), 7.46 (d, *J* = 9.2 Hz, 1H, ArH), 6.71 (dd, *J* = 4.27 Hz, 1H, ArH), 6.53 (d, *J* = 2.0 Hz, 1H, ArH), 3.49 (q, *J* = 7.07 Hz, 4H, CH<sub>2</sub>CH<sub>3</sub>), 1.26 (t, *J* = 7.2 Hz, 6H, CH<sub>2</sub>CH<sub>3</sub>). <sup>13</sup>C-NMR (400 MHz, CDCl<sub>3</sub>): δ (in ppm) = 165.52, 164.42, 158.07, 153.78, 150.27, 131.94, 110.91, 108.59, 105.70, 96.89, 45.34, 12.39.

MALDI-TOF mass: Anal. Calcd for  $[C_{14}H_{15}NO_4]^+$   $m/z = 261.10$

Found  $m/z = 261.32$

1.2 Preparation of 7-diethylamino-2-oxo-2H-chromen-3-carboxylic chloride (**2**)

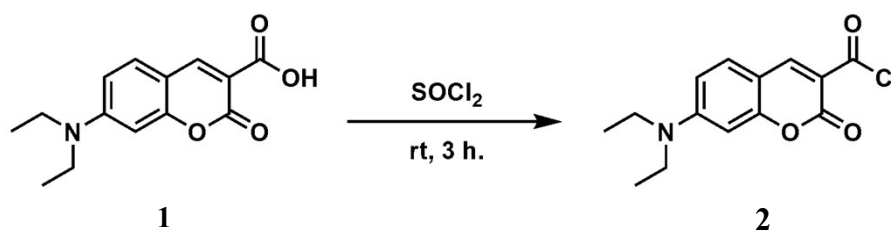

**Scheme S2** Synthesis of compound **2**

Into a two-neck round bottom flask equipped with a magnetic bar, **1** (0.187 g, 0.7 mmol) was added to dry thionyl chloride (3 mL) and the suspension was stirred at room temperature for 3 hours under nitrogen atmosphere. The precipitate was washed with dichloromethane under vacuum to give a yellow solid **2** in a quantitative yield.

$^1H$ -NMR (400 MHz,  $CDCl_3$ ):  $\delta$  (in ppm) = 8.68 (s, 1H, ArH), 7.49 (d,  $J = 4.4$  Hz, 1H, ArH), 6.76 (m, 1H, ArH), 6.59 (s, 1H, CCH), 3.50 (q,  $J = 6.9$  Hz, 4H,  $CH_2CH_3$ ), 1.28 (t,  $J = 3.4$  Hz, 6H,  $CH_2CH_3$ )

2. Characterization of the compounds

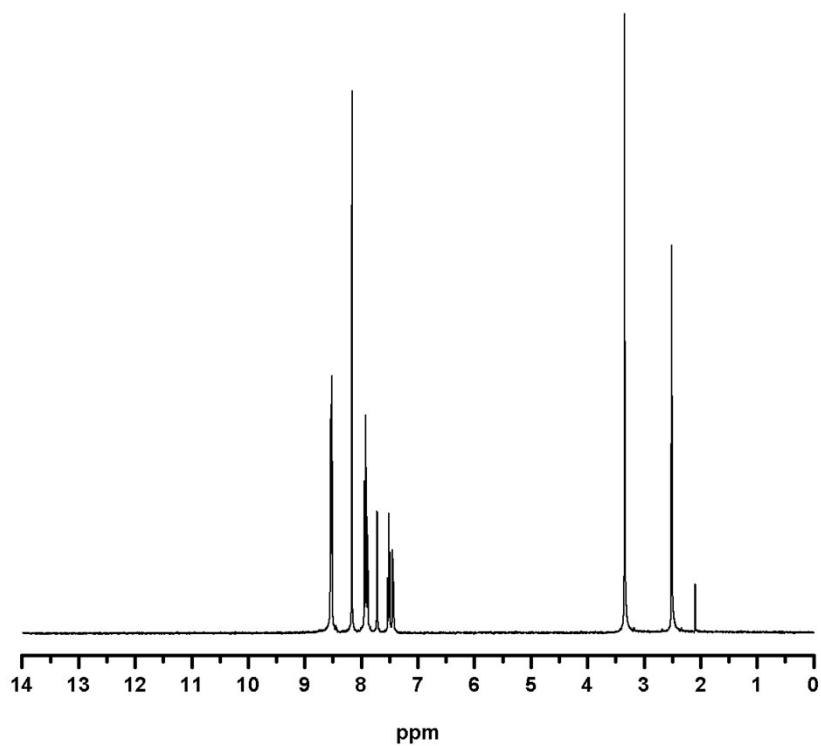

**Figure S1** The  $^1\text{H}$ -NMR spectrum of sensor **NB** in  $\text{DMSO-}d_6$  at 400 MHz

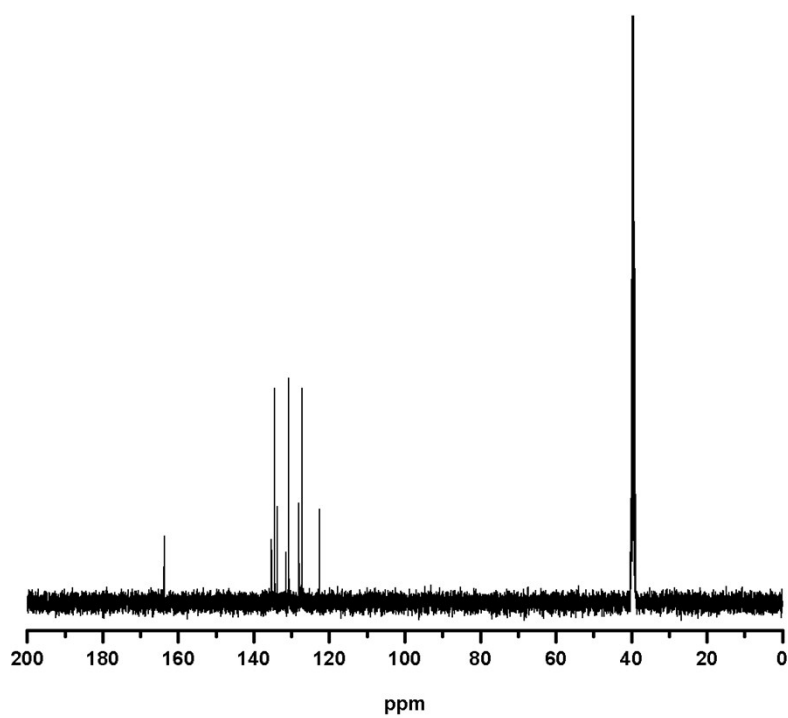

**Figure S2** The  $^{13}\text{C}$ -NMR spectrum of sensor **NB** in  $\text{DMSO-}d_6$  at 400 MHz

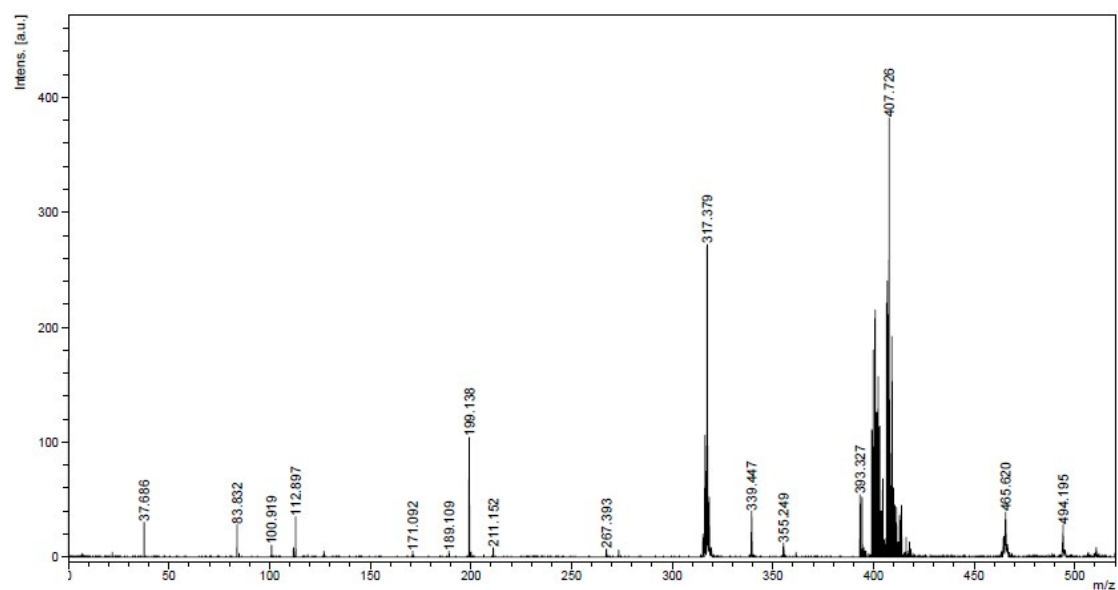

**Figure S3** MALDI-TOF mass spectrum of sensor **NB** shown at 317.379 m/z

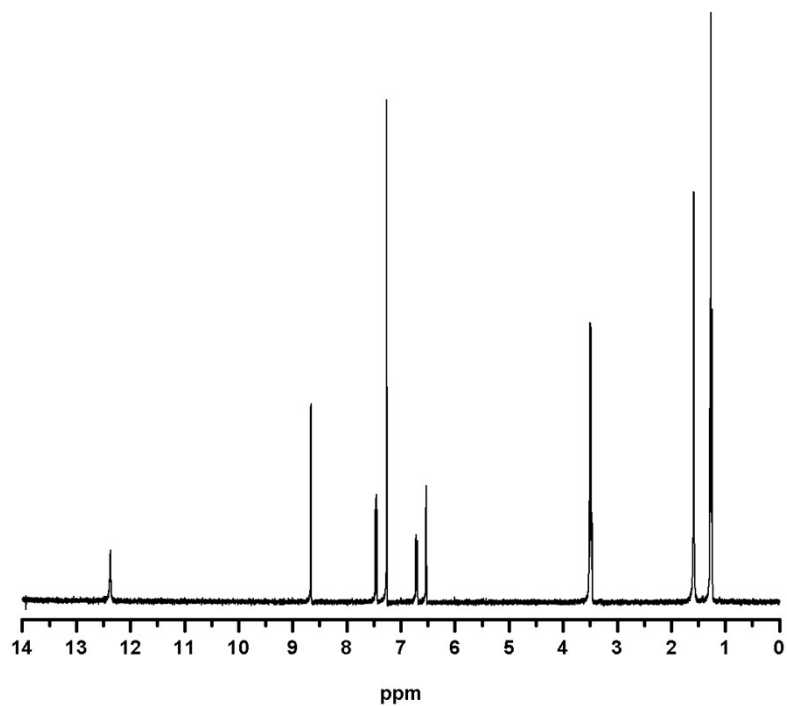

**Figure S4** The  $^1\text{H}$ -NMR spectrum of **1** in  $\text{CDCl}_3$  at 400 MHz

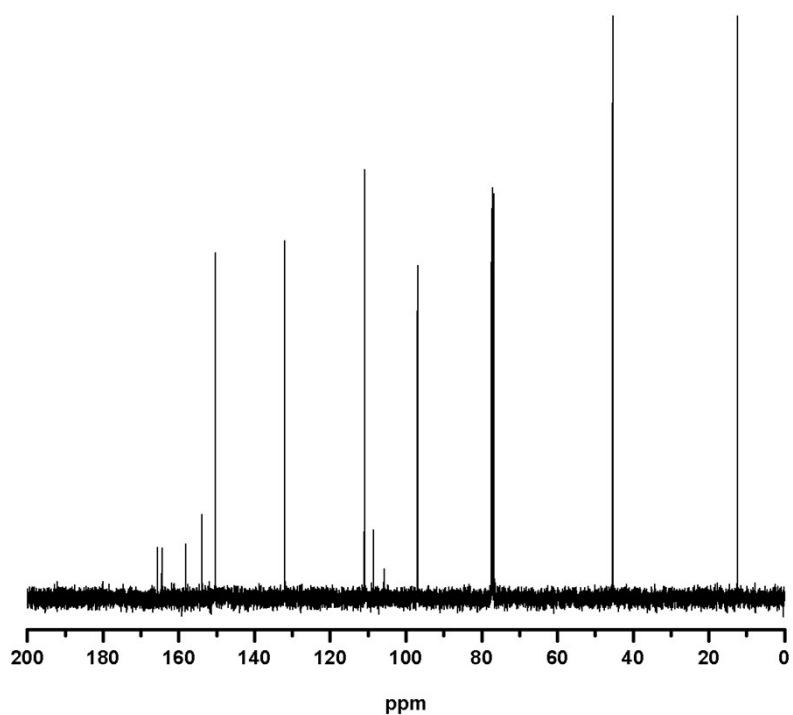

**Figure S5** The  $^{13}\text{C}$ -NMR spectrum of **1** in  $\text{CDCl}_3$  at 400 MHz

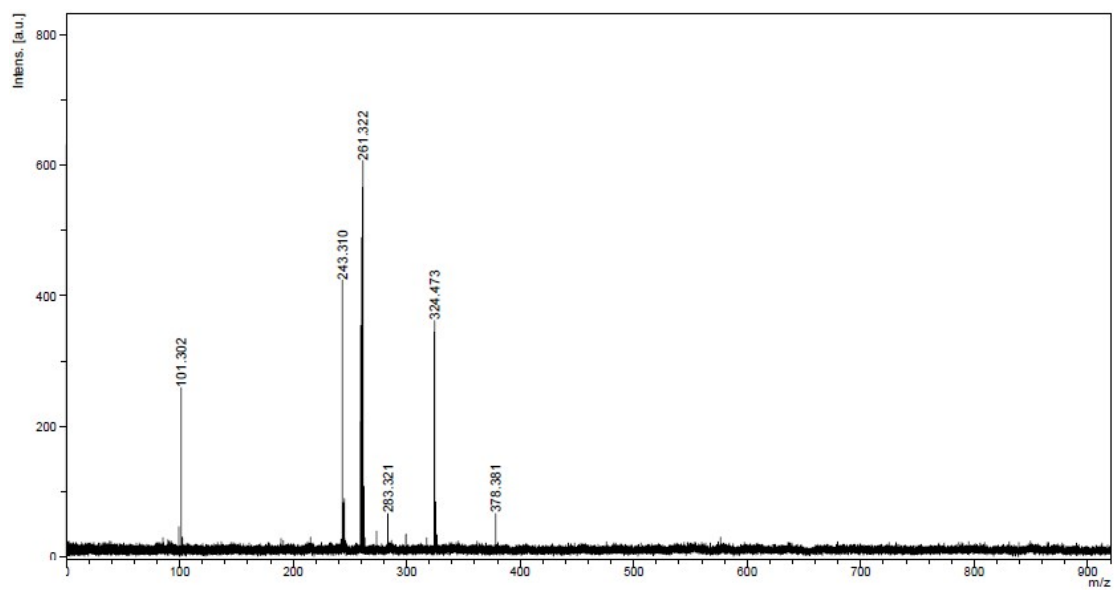

**Figure S6** MALDI-TOF mass spectrum of **1** shown at 261.322m/z

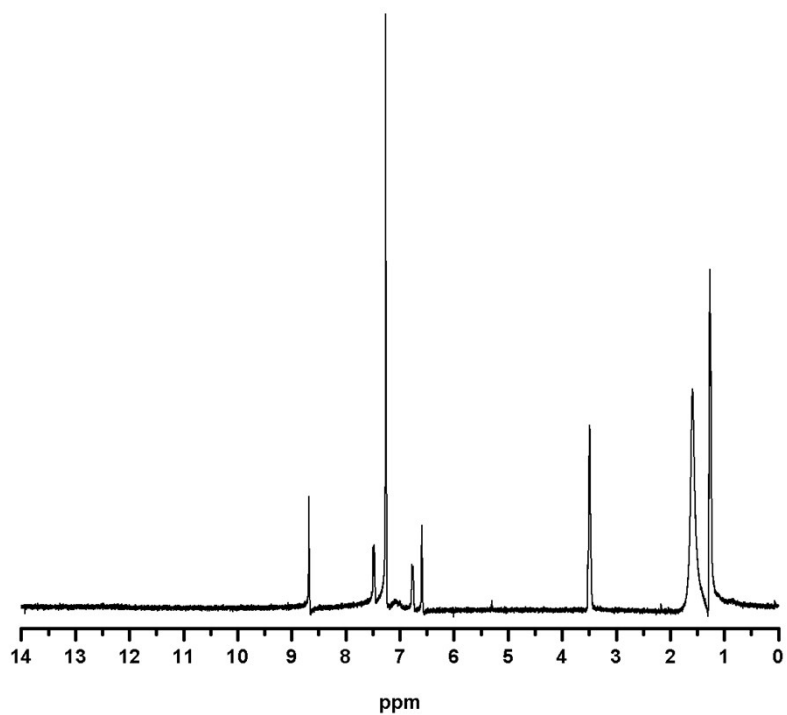

**Figure S7** The  $^1\text{H}$ -NMR spectrum of **2** in  $\text{CDCl}_3$  at 400 MHz

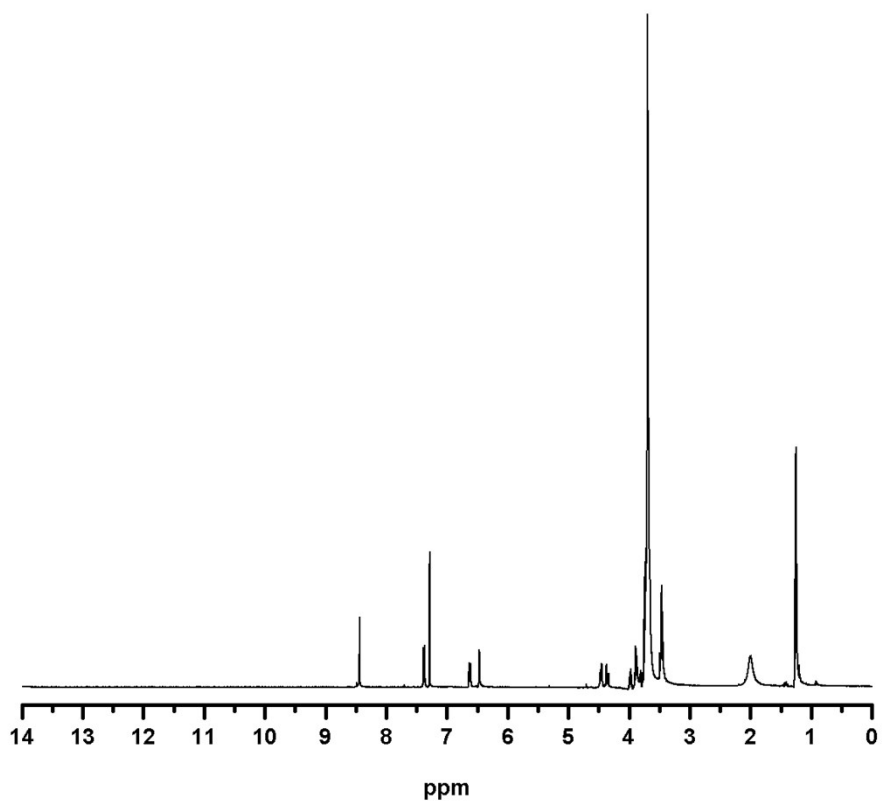

**Figure S8** The  $^1\text{H}$ -NMR spectrum of sensor **CC** in  $\text{CDCl}_3$  at 400 MHz

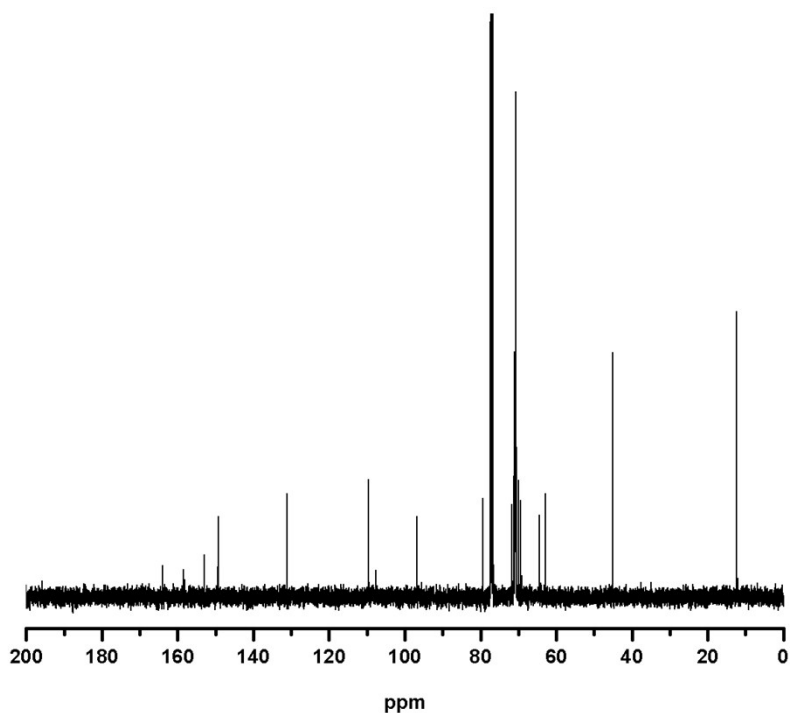

**Figure S9** The  $^{13}\text{C}$ -NMR spectrum of sensor **CC** in  $\text{CDCl}_3$  at 400 MHz

### Mass Spectrum List Report

|                      |                                                                 |                   |                      |
|----------------------|-----------------------------------------------------------------|-------------------|----------------------|
| <b>Analysis Info</b> |                                                                 | Acquisition Date  | 3/15/2013 2:22:02 PM |
| Analysis Name        | D:\Data\Data Service\Year 2013\Small molecule\03152013\CC_pos.d | Operator          | BDAL@DE              |
| Method               | tune_low.m                                                      | Instrument / Ser# | microTOF-Q II 10335  |
| Sample Name          | CC_pos                                                          |                   |                      |
| Comment              |                                                                 |                   |                      |

#### Acquisition Parameter

|             |            |                       |           |                  |           |
|-------------|------------|-----------------------|-----------|------------------|-----------|
| Source Type | ESI        | Ion Polarity          | Positive  | Set Nebulizer    | 0.3 Bar   |
| Focus       | Not active | Set Capillary         | 4500 V    | Set Dry Heater   | 180 °C    |
| Scan Begin  | 50 m/z     | Set End Plate Offset  | -500 V    | Set Dry Gas      | 4.0 l/min |
| Scan End    | 1000 m/z   | Set Collision Cell RF | 150.0 Vpp | Set Divert Valve | Waste     |

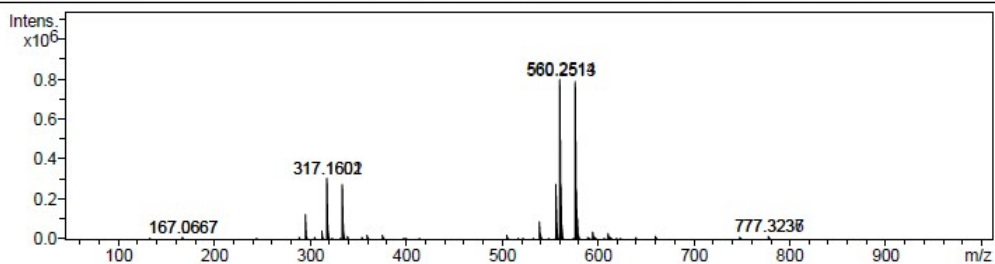

**Figure S10** The ESI-High Resolution Mass spectrum of sensor **CC** at 560.25 m/z

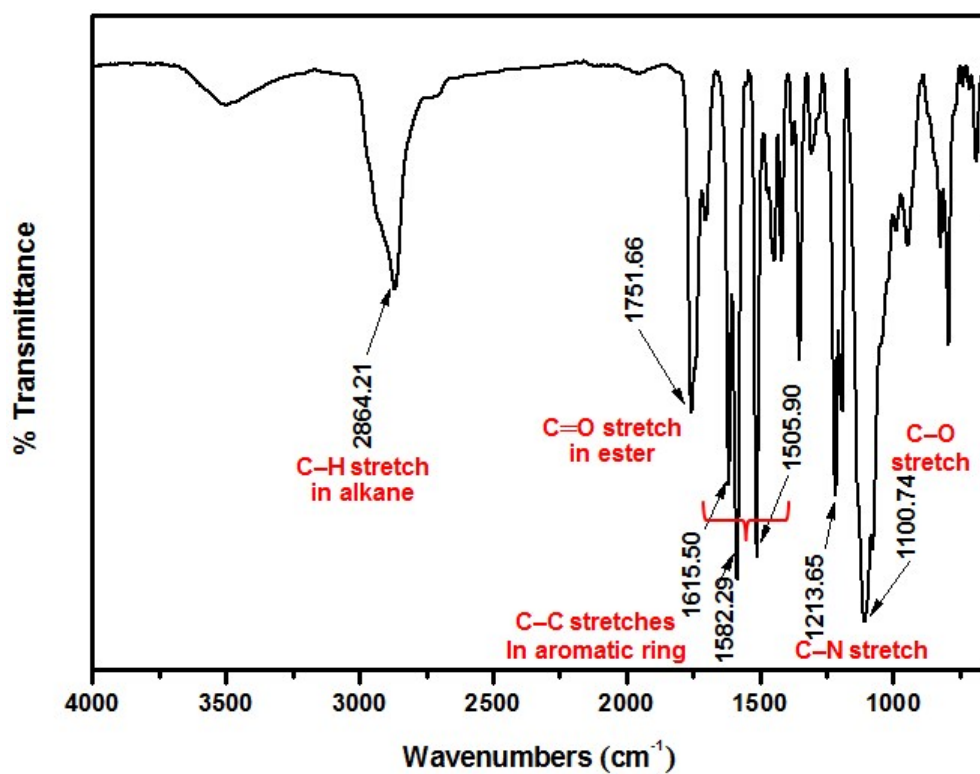

Figure S11 IR spectrum of sensor CC

### 3. Job's plots studies

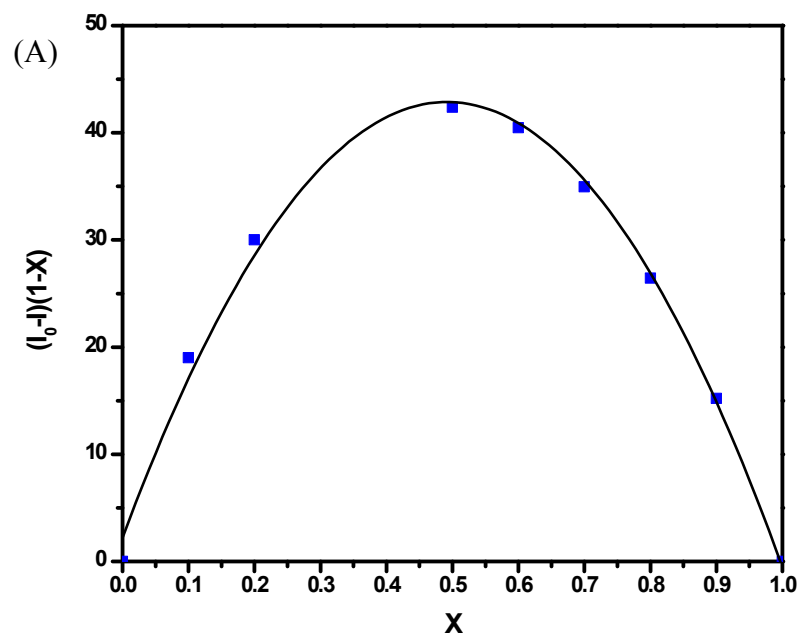



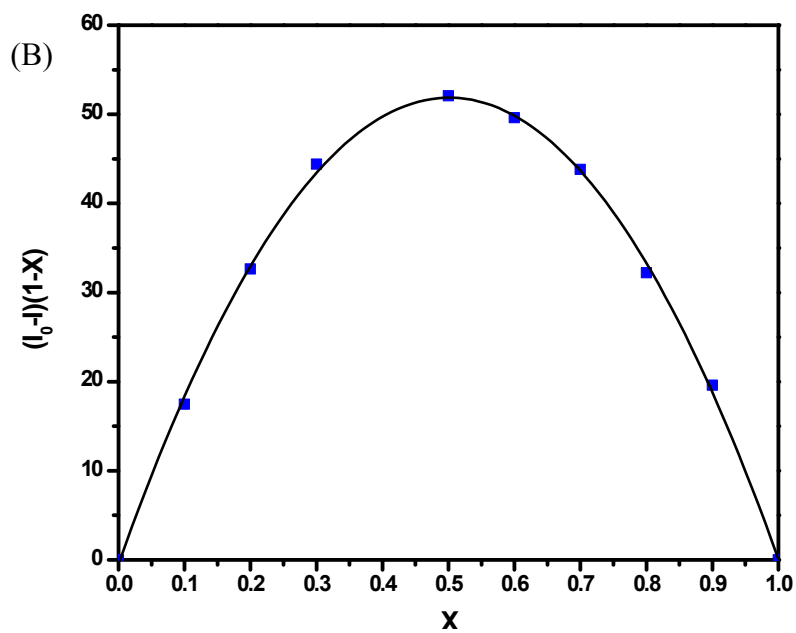

**Figure S12** Job's plots for 1:1 complex of sensor **NB** with (A) DA (B) NE at  $1 \times 10^{-5}$  M in DMSO:phosphate buffer (0.01 M, pH 7.4, 1:9, v/v)

#### 4. Non-linear regression plots

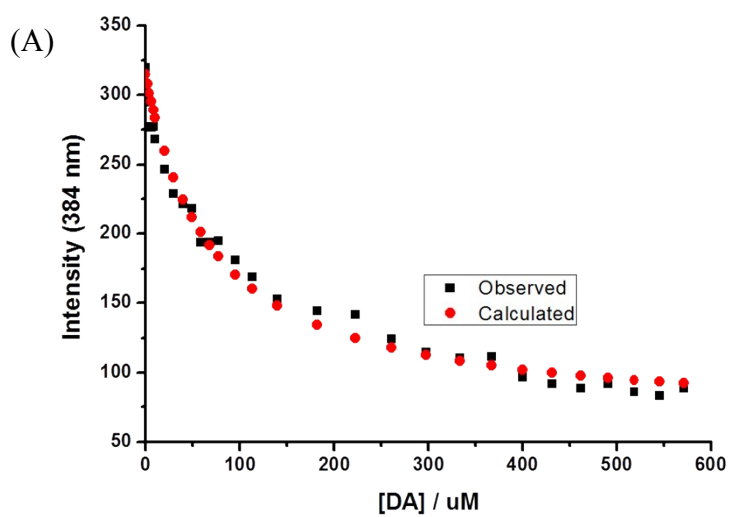

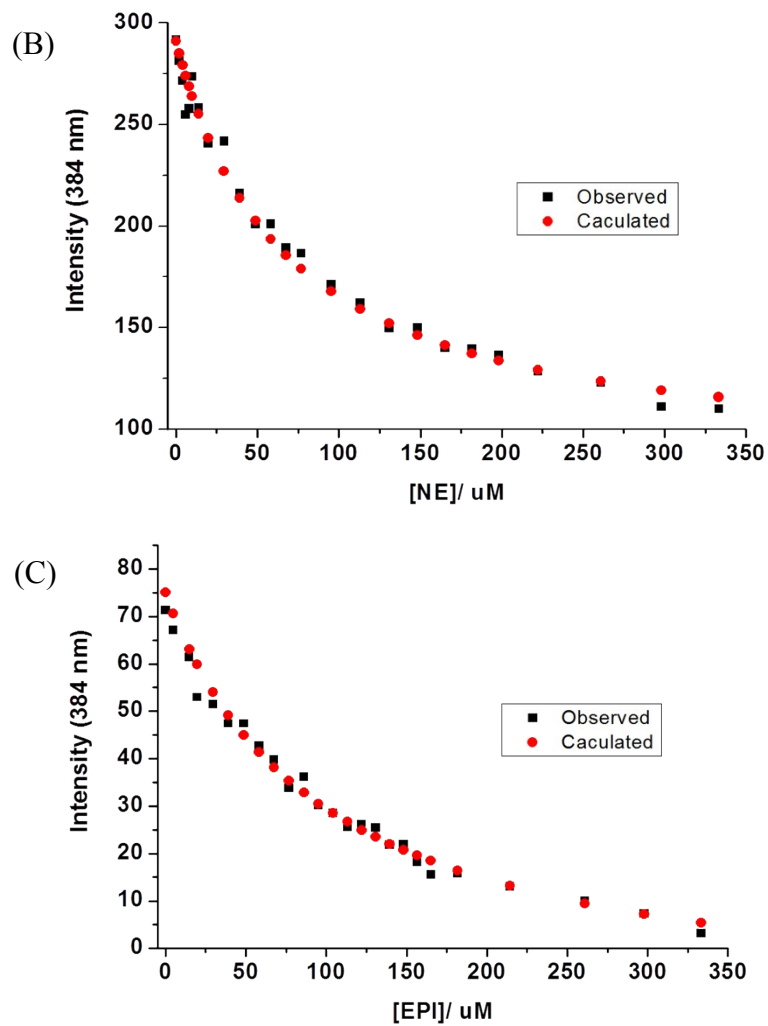

**Figure S13.** Non-linear regression plots of sensor **NB** ( $1 \times 10^{-5}$  M) toward 0-80 equiv. of (A) DA (B) NE and (C) EPI in DMSO:phosphate buffer (0.01 M, pH 7.4, 1:9, v/v) for calculation of binding constant ( $K_s$ )

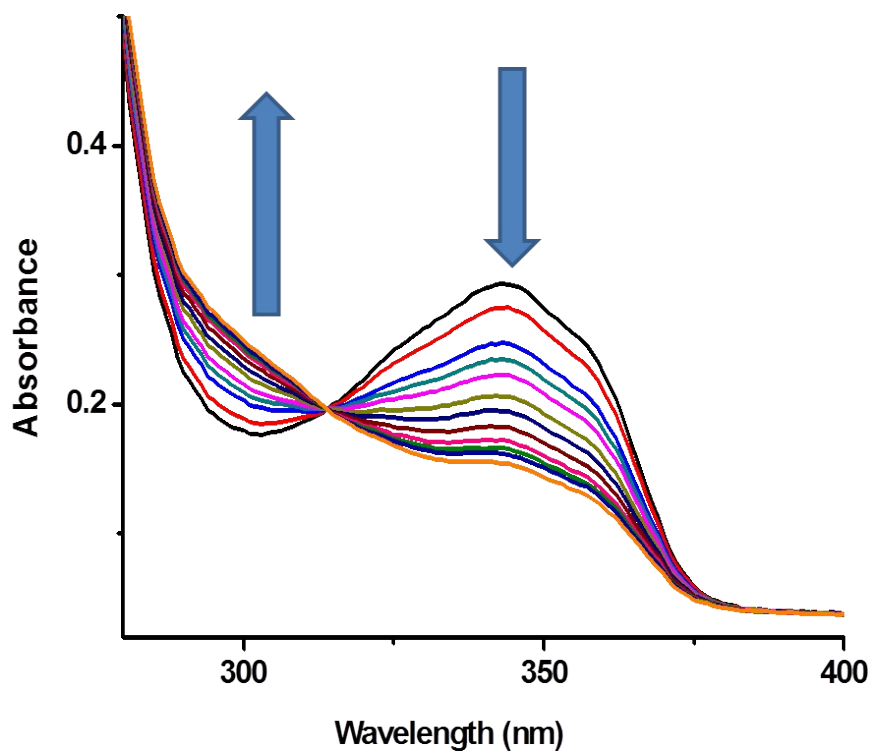

Figure S14. UV-vis spectra titration **NB** with EPI

5. Calibration curves of detection limit for DA, NE and EPI

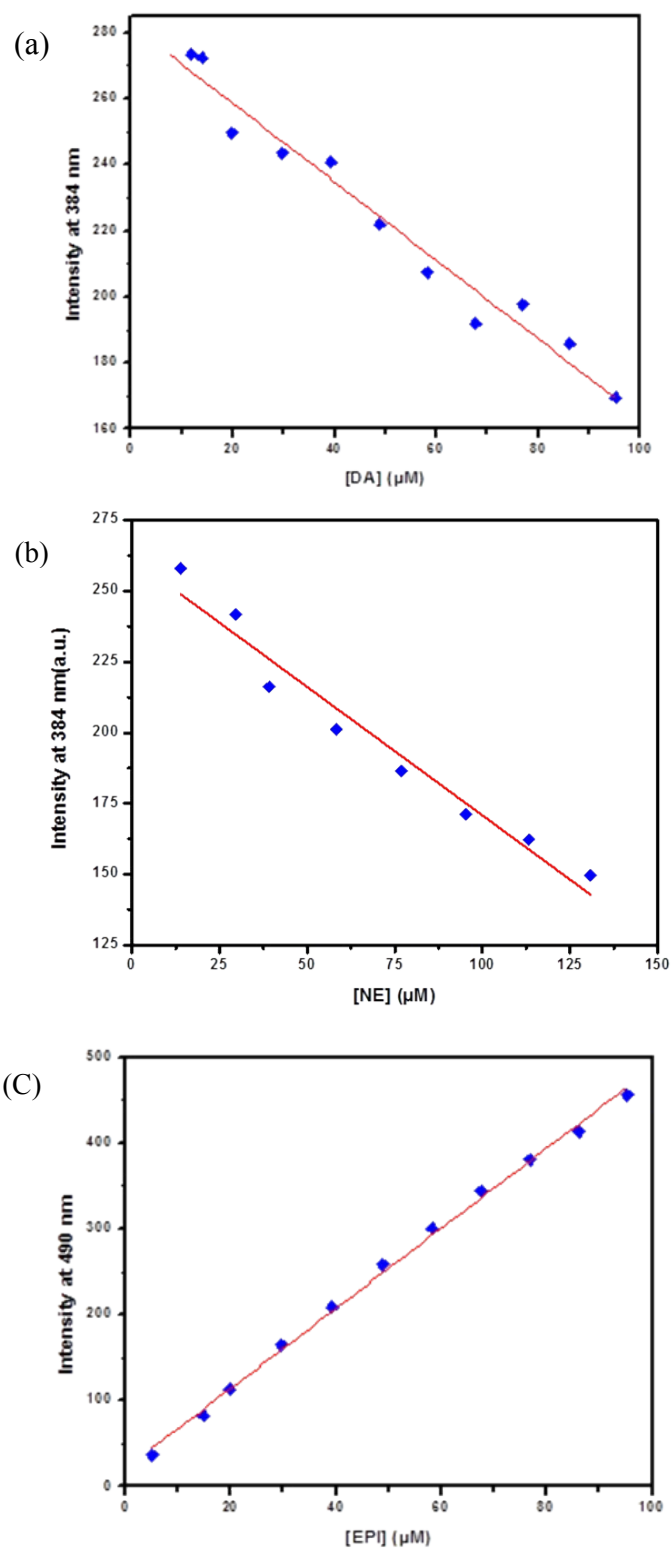

**Figure S15.** Linear plot of fluorescence intensity between sensor with a) DA b) NE c) EPI complexes and concentration of catecholamine guests

6. Complexation studies of sensor **CC** with various guests by fluorescence spectrophotometry technique

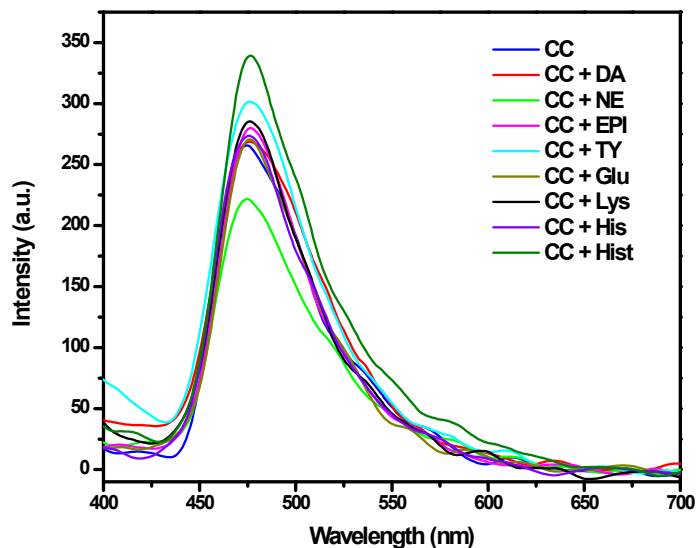

**Figure S16** Fluorescence spectra of sensor **CC** ( $5 \times 10^{-5}$  M) in DMSO:phosphate buffer (0.1 M, pH 7.4, 1:9, v/v) in the present of various guest 100 equiv. ( $\lambda_{\text{ex}} = 340$  nm)

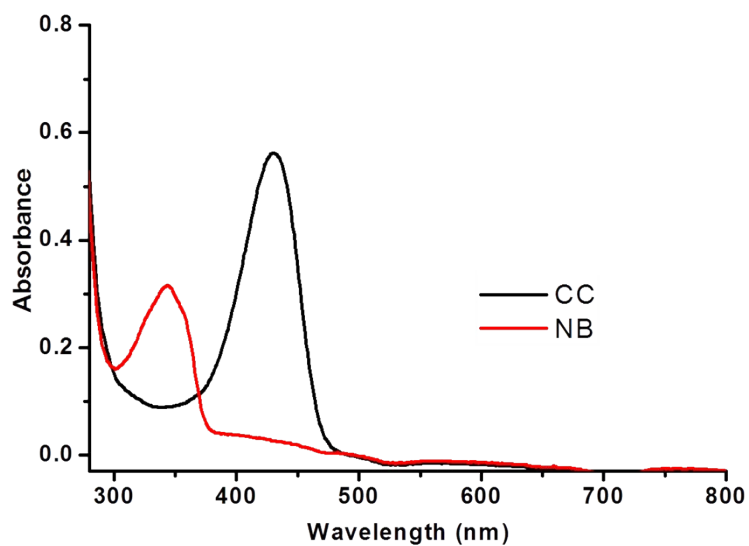

**Figure 17.** UV-vis spectra of **NB** and **CC**  $1 \times 10^{-4}$  M

7. Principle component analysis (PCA) method for analysis of complexation

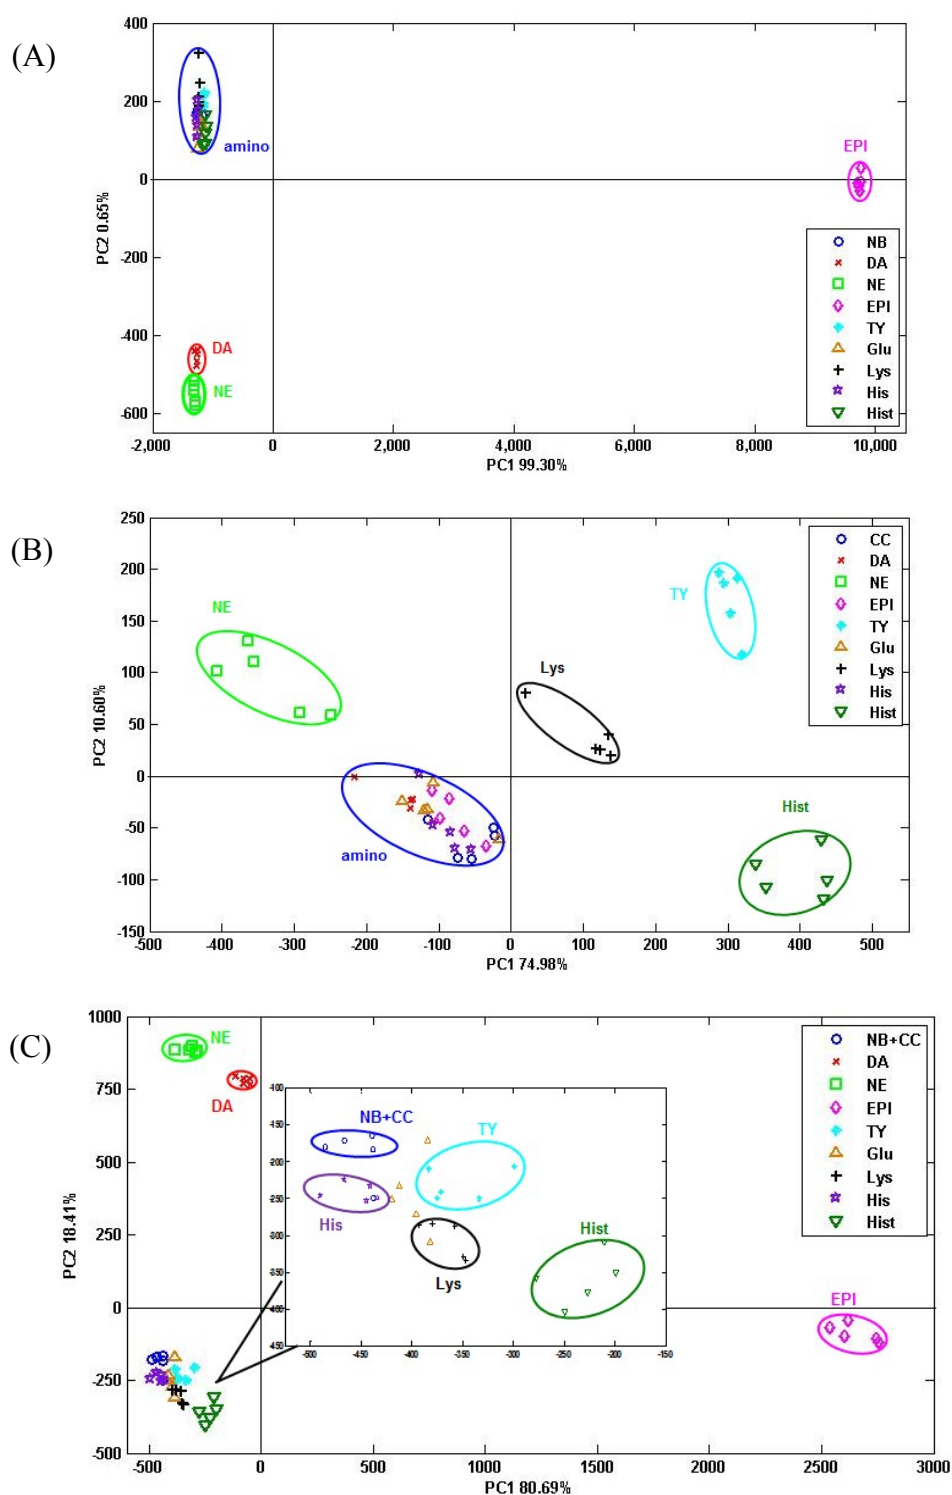

**Figure S18.** PCA score plot of (A) sensor NB (B) sensor CC and (C) the mixture sensors NB and CC upon addition of various guests (100 equiv.) in 1:9, v/v DMSO:phosphate buffer (pH 7.4). PCA score plot shows clustering for all 9 samples.

8. Complexation study of sensor **NB** with EPI in human urine sample

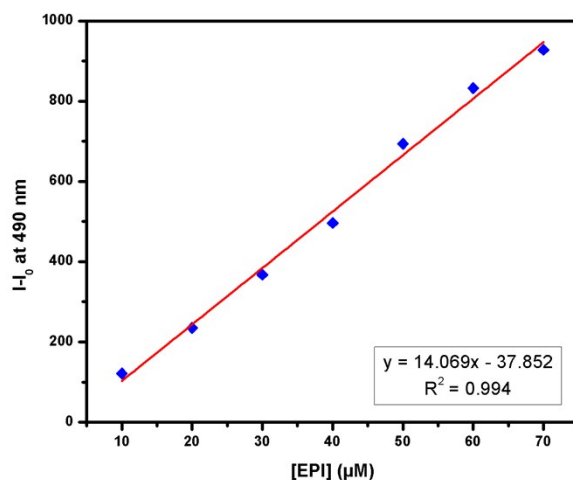

**Figure S19.** Calibration curve of sensor **NB** with the spiked EPI in the synthetic urine

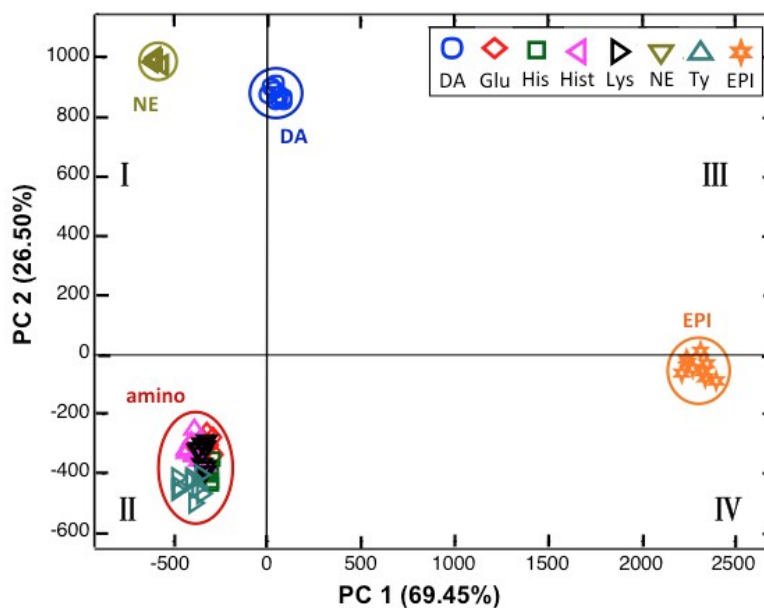

**Figure S20.** PCA score plots of mixed **NB** and **CC** upon addition of various guests (100 equiv.) in urine samples and including fluorescence data of EPI for determining of PCA analysis

**Table S1** Composition of synthetic urine [1]

| Species                                                                         | Concentration (g l <sup>-1</sup> ) | Concentration (mmol l <sup>-1</sup> ) |
|---------------------------------------------------------------------------------|------------------------------------|---------------------------------------|
| CaCl <sub>2</sub> .H <sub>2</sub> O                                             | 0.65                               | Ca: 4.3                               |
| MgCl <sub>2</sub> .6H <sub>2</sub> O                                            | 0.651                              | Mg:3.2                                |
| NaCl                                                                            | 4.6                                | SO <sub>4</sub> : 16                  |
| Na <sub>2</sub> SO <sub>4</sub>                                                 | 2.3                                | Citrate: 2.3                          |
| Na <sub>3</sub> C <sub>6</sub> H <sub>8</sub> O <sub>7</sub> .2H <sub>2</sub> O | 0.65                               | Oxalate: 0.149                        |
| Na <sub>2</sub> C <sub>2</sub> O <sub>4</sub>                                   | 0.020                              |                                       |
| KH <sub>2</sub> PO <sub>4</sub>                                                 | 2.8                                | PO <sub>4</sub> : 20.5                |
| KCl                                                                             | 1.6                                |                                       |
| NH <sub>4</sub> Cl                                                              | 1                                  | NH <sub>4</sub> : 19                  |
| CO(NH <sub>2</sub> ) <sub>2</sub>                                               | 25                                 |                                       |
| C <sub>4</sub> H <sub>7</sub> N <sub>3</sub> O                                  | 1.1                                |                                       |
| Total Na = 118 mEq                                                              |                                    |                                       |
| Total K = 42 mEq                                                                |                                    |                                       |
| pH = 5.8                                                                        |                                    |                                       |

**Table S2** Comparison of the sensitivity of sensory system for dopamine

| Sensing materials                                    | Detection        | Linear range                                | LOD                   | Ref.      |
|------------------------------------------------------|------------------|---------------------------------------------|-----------------------|-----------|
| MIP-Si-ITO <sup>a</sup> electrode                    | Electrochemistry | 2x10 <sup>-6</sup> – 8x10 <sup>-4</sup> M.  | 2x10 <sup>-6</sup> M. | 2         |
| Au at SiO <sub>2</sub> -MIPs-GCE                     | Electrochemistry | 4.8x10 <sup>-8</sup> -5x10 <sup>-5</sup> M. | 2x10 <sup>-8</sup> M  | 3         |
| C60-CNT/IL/GC electrode                              | Electrochemistry | 0.06-25 μM                                  | 15 nM                 | 4         |
| Citrate-caped AuNPs                                  | Colorimetric     | 2.5-20 μM                                   | 2500 nM               | 5         |
| MBA-and DSP-modified AuNPs <sup>b</sup>              | Colorimetric     | 5-180 nM                                    | 0.5 nM                | 6         |
| Fe <sub>3</sub> O <sub>4</sub> NPs                   | Fluorescence     | 0.01-0.4 μM                                 | 3 μM                  | 7         |
| Self-assembled <b>PBA</b> and <b>CC</b> <sup>c</sup> | Fluorescence     | 16.7-47.4 μM                                | 1.47 μM               | 8         |
| Phosphate-modified TiO <sub>2</sub> NPs              | Fluorescence     | 0.5-100 μM                                  | 30 nM                 | 9         |
| Napthalimide-boronic acid                            | Fluorescence     | 11.9-95.2 μM                                | 7.71 μM               | This work |

<sup>a</sup>Si-ITO: silanized indium tin oxide electrode.

<sup>b</sup>**MBA**, 4-mercaptophenylboronic acid; **DSP**, dithiobis (succinimidyl propionate)

<sup>c</sup>**PBA**, Pyrene boronic acid; **CC**, crown-coumarin

[1] E. Tilley, J. Atwater, D. Mavrinic, Effects of storage on phosphorus recovery from urine, *Environ. Technol.* 29 (2007) 807-816.

[2] N. Gao, Z. Xu, F. Wang, S. Dong, *Electroanalysis*, 2007, **19**, 1655–1660.



- [3] D. Yu, Y. Zeng, Y. Qi, T. Zhou, G. Shi, *Biosen. Bioelectron.*, 2012, **38**, 270–277.
- [4] M. Mazloun-Ardakani, A. Khoshroo, *Electrochem. Commun.* 2014, **42**, 9–12.
- [5] R. Baron, M. Zayats, I. Willner, *Anal. Chem.*, 2005, **77**, 1566-1571.
- [6] B.A. Kong, A.W. Zhu, Y.P. Luo, Y. Tain, Y.Y. Yu, G.Y. Shi, *Angew. Chem, Int. Ed.*, 2011, **50**, 1837-1840.
- [7] C.-H. Liu, C. J. Yu, W.-L. Tseng, *Anal. Chim. Acta*, 2012, **745**, 143-148.
- [8] A. Chaicham, S. Sahasithiwat, T. Tuntulani, B. Tomapatanaget, *Chem. Commun.*, 2013, **49**, 9287-9289
- [9] H.P. Wu, T.L. Chang, W.L. Tseng, *Langmuir*, 2007, **23** 7880-7885.
